# Supplementary material
Source: PubMed Central journal article supplement (PMC6954305)
Supplement: NIHMS1541211-supplement-1.pdf [file NIHMS1541211-supplement-1.pdf]

## **SUPPLEMENTARY TABLES FOR**

### **Circulating tumor cells exhibit metastatic tropism and reveal brain metastasis drivers**

Remi Klotz, Amal Thomas, Teng Teng, Sung Min Han, Oihana Iriondo, Lin Li, Sara Restrepo-Vassalli, Alan Wang, Negeen Izadian, Matthew MacKay, Byoung-San Moon, Kevin J. Liu, Sathish Kumar Ganesan, Grace Lee, Diane S. Kang, Charlotte S. Walmsley, Christopher Pinto, Michael F. Press, Wange Lu, Janice Lu, Dejan Juric, Aditya Bardia, James Hicks, Bodour Salhia, Frank Attenello, Andrew D. Smith, Min Yu

**File includes supplementary tables S1 to S10**  
(Large Supplementary Table S3, S4, S8 and S10 were uploaded as separate xlsx files)

**Table S1. Breast cancer patient information. Clinical information regarding metastatic lesions are reported for patient from whom CTC lines were generated. To ensure genetic stability in CTC line over time in culture, we used the Ovation Target Enrichment System for identification of changes in key driver mutations allele frequency in BRx68**

| Patient No                                                               | BRx07                           | BRx42                                                | BRx50                           | BRx68                           |                                                              |          |           |           |
|--------------------------------------------------------------------------|---------------------------------|------------------------------------------------------|---------------------------------|---------------------------------|--------------------------------------------------------------|----------|-----------|-----------|
| <b>Blood Collection</b>                                                  | 08/15/2012                      | 09/24/2013                                           | 04/22/2013                      | 05/08/2013                      |                                                              |          |           |           |
| <b>Bone</b>                                                              | Yes                             | Yes                                                  | Yes                             | Yes                             |                                                              |          |           |           |
| <b>Lung</b>                                                              | Yes (small nodules <1cm)        | No                                                   | No                              | Yes (LNs)                       |                                                              |          |           |           |
| <b>Ovary</b>                                                             | No                              | Yes                                                  | No                              | No                              |                                                              |          |           |           |
| <b>Brain</b>                                                             | No (MRI brain negative in 2011) | No (developed later. MRI brain positive on 10/31/14) | No (MRI brain negative in 2011) | No (MRI brain negative in 2011) |                                                              |          |           |           |
| <b>Mutation detected in CTC lines (as described in Yu and al., 2014)</b> | <b>BRx07</b>                    | <b>BRx42</b>                                         | <b>BRx50</b>                    | <b>BRx68</b>                    | <b>Mutant allele frequency over time in culture in BRx68</b> |          |           |           |
|                                                                          | TP53                            | KRAS                                                 | BRCA2                           | TP53                            | 7 months                                                     | 8 months | 12 months | 18 months |
|                                                                          | PIK3CA                          | PIK3CA                                               | IKZF1                           | PIK3CA                          | 0.685                                                        | 0.818    | 0.852     | 0.75      |
|                                                                          | FGFR2                           | IGF1R                                                | ESR1                            | ESR1                            | 0.744                                                        | 0.707    | 0.719     | 0.784     |
|                                                                          | CDH1                            |                                                      |                                 | MSN                             | 0.5                                                          | 0.697    | 0.5       | 0.469     |
| APC                                                                      |                                 |                                                      |                                 |                                 |                                                              |          |           |           |
| DGKQ                                                                     |                                 |                                                      |                                 |                                 |                                                              |          |           |           |
| MAML2                                                                    |                                 |                                                      |                                 |                                 |                                                              |          |           |           |

**Table S2. Metastatic potential in breast cancer patient-derived CTC lines. Comparison of organ tropism between parental CTC lines and CTC-derived metastatic variants. Percent of mice exhibiting brain, bone, lung and ovary metastases, 8 months (BRx50) or 5 months (BRx68 and BRx07) after inoculation with parental lines (first generation) and metastatic variants (second or third generation). n = number of mice.**

| CTC lines (intracardiac injection)              | Metastases n (%) |            |          |             |
|-------------------------------------------------|------------------|------------|----------|-------------|
|                                                 | Brain            | Bone       | Lung     | Ovary       |
| <b>BRx07</b>                                    |                  |            |          |             |
| BRx07 (1st generation) n=18                     | 0 (0%)           | 3 (17%)    | 13 (72%) | 13 (72%)    |
| BRx07LuM1 (2nd generation) n=6                  | 0 (0%)           | 2 (33%)    | 6 (100%) | 5 (83%)     |
| BRx07LuM2 (3rd generation) n=5                  | 0 (0%)           | 0 (0%)     | 5 (100%) | 4 (80%)     |
| Fisher's Exact Test <i>P-value</i> (1st vs 2nd) | 1.00             | 0.57       | 0.28     | 1.00        |
| Fisher's Exact Test <i>P-value</i> (1st vs 3rd) | 1.00             | 1.00       | 0.55     | 1.00        |
| Fisher's Exact Test <i>P-value</i> (2nd vs 3rd) | 1.00             | 0.45       | 1.00     | 1.00        |
| <b>BRx50</b>                                    |                  |            |          |             |
| BRx50 (1st generation) n=18                     | 1 (6%)           | 1 (6%)     | 0 (0%)   | 0 (0%)      |
| BRx50BrM1 (2nd generation) n=3                  | 3 (100%)         | 1 (33%)    | 0 (0%)   | 2 (67%)     |
| BRx50BrM2 (3rd generation) n=8                  | 4 (50%)          | 2 (25%)    | 0 (0%)   | 2 (25%)     |
| Fisher's Exact Test <i>P-value</i> (1st vs 2nd) | <b>0.003</b>     | 0.27       | 1.00     | <b>0.01</b> |
| Fisher's Exact Test <i>P-value</i> (1st vs 3rd) | <b>0.02</b>      | 0.22       | 1.00     | 0.09        |
| Fisher's Exact Test <i>P-value</i> (2nd vs 3rd) | 0.24             | 1.00       | 1.00     | 0.49        |
| <b>BRx68</b>                                    |                  |            |          |             |
| BRx68 (1st generation) n=12                     | 0 (0%)           | 4 (33%)    | 1 (3%)   | 5 (42%)     |
| BRx68BoM1 (2nd generation) n=16                 | 2 (12.5%)        | 10 (62.5%) | 0 (0%)   | 9 (56%)     |
| Fisher's Exact Test <i>P-value</i>              | 0.49             | 0.25       | 0.43     | 0.7         |

**Table S5. List of differentially expressed genes in bone stromal cells after tumor formation.**

| Ensembl gene id     | Gene symbol | log2FoldChange | pvalue          | padj            |
|---------------------|-------------|----------------|-----------------|-----------------|
| ENSMUSG00000021194  | Chga        | 6.101342879    | 5.40E-08        | 7.52E-05        |
| ENSMUSG00000074006  | Omp         | 6.169660643    | 5.83E-07        | 0.0006210538443 |
| ENSMUSG00000038115  | Ano2        | 4.987103786    | 1.45E-06        | 0.001310478896  |
| ENSMUSG000000051111 | Sv2c        | 4.87675386     | 3.57E-06        | 0.002939848026  |
| ENSMUSG00000023032  | Slc4a8      | 2.862484226    | 4.23E-06        | 0.003196940916  |
| ENSMUSG00000006575  | Rundc3a     | 3.1135593      | 4.24E-06        | 0.003196940916  |
| ENSMUSG00000003410  | Elavl3      | 4.918516724    | 4.74E-06        | 0.003435269758  |
| ENSMUSG00000027895  | Kcnc4       | 4.383850221    | 9.82E-06        | 0.006585568415  |
| ENSMUSG00000053693  | Mast1       | 2.054807541    | 1.55E-05        | 0.008793944672  |
| ENSMUSG00000044217  | Aqp5        | 4.328279112    | 1.53E-05        | 0.008793944672  |
| ENSMUSG00000032452  | Clstn2      | 4.150347977    | 1.66E-05        | 0.009092529073  |
| ENSMUSG00000021803  | Cdhr1       | 4.509507339    | 1.99E-05        | 0.01027412167   |
| ENSMUSG000000031026 | Trim66      | 4.435764827    | 2.06E-05        | 0.01037096975   |
| ENSMUSG00000039809  | Gabbr2      | 5.820666875    | 2.58E-05        | 0.01197580834   |
| ENSMUSG00000000247  | Lhx2        | 4.244331078    | 2.67E-05        | 0.01209647359   |
| ENSMUSG000000035355 | Kcnh4       | 3.818751754    | 3.25E-05        | 0.0140115914    |
| ENSMUSG00000047787  | Flrt1       | 3.281575546    | 3.83E-05        | 0.01576444324   |
| ENSMUSG00000000983  | Wfdc18      | 6.198374563    | 4.37E-05        | 0.0172085121    |
| ENSMUSG000000029168 | Dpysl5      | 4.026436021    | 4.83E-05        | 0.0175169607    |
| ENSMUSG00000022619  | Mapk8ip2    | 4.979405295    | 4.84E-05        | 0.0175169607    |
| ENSMUSG00000058589  | Anks1b      | 3.732938583    | 4.98E-05        | 0.01766607684   |
| ENSMUSG000000038453 | Scin1       | 3.480769058    | 5.37E-05        | 0.01833262313   |
| ENSMUSG00000078161  | BC007180    | 4.108538751    | 7.66E-05        | 0.02476103474   |
| ENSMUSG00000025813  | Homer2      | 2.671286211    | 8.20E-05        | 0.02558369884   |
| ENSMUSG000000098220 | Gm27031     | 4.257502883    | 8.19E-05        | 0.02558369884   |
| ENSMUSG00000028017  | Egf         | 3.212271515    | 8.77E-05        | 0.02618894743   |
| ENSMUSG000000041653 | Pnpla3      | 3.380347479    | 8.83E-05        | 0.02618894743   |
| ENSMUSG000000037386 | Rims2       | 5.498030283    | 8.68E-05        | 0.02618894743   |
| ENSMUSG00000022490  | Ppp1r1a     | 2.514050138    | 9.78E-05        | 0.02673623515   |
| ENSMUSG00000024411  | Aqp4        | 6.101372765    | 9.37E-05        | 0.02673623515   |
| ENSMUSG000000045761 | Fam179a     | 4.645715771    | 0.0001024797009 | 0.0272399953    |
| ENSMUSG00000029189  | Sel1l3      | 2.696390456    | 0.0001059895149 | 0.0274073744    |
| ENSMUSG00000040564  | Apoc1       | 4.452734331    | 0.0001101433669 | 0.02808035331   |
| ENSMUSG000000043969 | Emx2        | 4.636481328    | 0.0001129114868 | 0.02838626143   |
| ENSMUSG00000022780  | Mfi2        | 3.073603352    | 0.0001170691427 | 0.02863606152   |
| ENSMUSG00000025202  | Scd3        | 4.487023799    | 0.0001161534767 | 0.02863606152   |
| ENSMUSG000000032890 | Rims3       | 3.132328051    | 0.0001265906866 | 0.02975867556   |
| ENSMUSG00000029657  | Hsph1       | 2.865108956    | 0.0001318870019 | 0.0302342399    |
| ENSMUSG00000030650  | Tmc5        | 3.891722279    | 0.0001389301683 | 0.03119227362   |
| ENSMUSG000000056216 | Cebpg       | 0.7572180985   | 0.0001458599257 | 0.03170381171   |
| ENSMUSG00000014725  | Adam28      | 4.231171674    | 0.0001506285734 | 0.03170381171   |
| ENSMUSG000000037974 | Muc5ac      | 4.904992428    | 0.0001477986136 | 0.03170381171   |
| ENSMUSG000000042672 | Dcst1       | 2.501674037    | 0.0001534861897 | 0.03193394851   |
| ENSMUSG00000022949  | Clic6       | 4.083132909    | 0.0001645088841 | 0.03345814957   |
| ENSMUSG000000031709 | Tbc1d9      | 1.327260987    | 0.0001696141269 | 0.03411317012   |

|                    |               |              |                 |                |
|--------------------|---------------|--------------|-----------------|----------------|
| ENSMUSG00000040412 | 5330417C22Rik | 4.238995942  | 0.000184069661  | 0.03585784796  |
| ENSMUSG00000047228 | BC048546      | 4.79962377   | 0.0001896217217 | 0.03651428495  |
| ENSMUSG00000062444 | Ap3b2         | 3.754786905  | 0.0001968452381 | 0.03711557973  |
| ENSMUSG00000029830 | Svopl         | 3.952256412  | 0.0002038697117 | 0.03765556787  |
| ENSMUSG00000039092 | Sptlc3        | 6.197728869  | 0.0002278918423 | 0.04084227957  |
| ENSMUSG00000028128 | F3            | 2.4120806    | 0.0002325462034 | 0.04126783164  |
| ENSMUSG00000037419 | Endod1        | 1.158178019  | 0.0002380292731 | 0.0415896479   |
| ENSMUSG00000022871 | Fetub         | 4.497900844  | 0.0002389549407 | 0.0415896479   |
| ENSMUSG00000078515 | Ddi2          | 0.4455092089 | 0.0002440952152 | 0.04168271217  |
| ENSMUSG00000020396 | Nefh          | 3.744370467  | 0.0002586323085 | 0.04341406357  |
| ENSMUSG00000023011 | Faim2         | 3.567432455  | 0.0002845703017 | 0.04599113421  |
| ENSMUSG00000042784 | Muc1          | 2.772634653  | 0.0002969350591 | 0.04756479207  |
| ENSMUSG00000056880 | Gadl1         | 5.146972635  | 0.0003082589142 | 0.04894556671  |
| ENSMUSG00000028699 | Tspan1        | 2.53001592   | 0.0003151945819 | 0.04918394076  |
| ENSMUSG00000002190 | Clgn          | 5.409586714  | 0.0003195314681 | 0.04943452225  |
| ENSMUSG00000098178 | Yam1          | -19.70427924 | 6.50E-19        | 1.96E-15       |
| ENSMUSG00000064337 | mt-Rnr1       | -5.972865859 | 1.96E-10        | 3.54E-07       |
| ENSMUSG00000064339 | mt-Rnr2       | -4.614609045 | 1.37E-05        | 0.008285677647 |

**Table S6. List of differentially expressed genes in lung stromal cells after tumor formation.**

| Ensembl gene id    | Gene symbol | log2FoldChange | pvalue   | padj            |
|--------------------|-------------|----------------|----------|-----------------|
| ENSMUSG00000053469 | Tg          | 6.737996047    | 1.67E-11 | 9.04E-08        |
| ENSMUSG00000022157 | Mcpt8       | -11.98931127   | 6.33E-08 | 0.0001711042441 |

**Table S7. List of differentially expressed genes in brain stromal cells after tumor formation and overlapping with microglia activation signature (Das., et al 2016 (12)).**

| Ensembl gene id    | Gene symbol | log2FoldChange | pvalue   | padj            |
|--------------------|-------------|----------------|----------|-----------------|
| ENSMUSG00000030341 | Tnfrsf1a    | 2.039008872    | 7.11E-09 | 5.16E-06        |
| ENSMUSG00000060591 | Ifitm2      | 2.57281611     | 2.24E-08 | 1.54E-05        |
| ENSMUSG0000007041  | Clic1       | 2.839077995    | 5.94E-08 | 3.66E-05        |
| ENSMUSG00000052837 | Junb        | 1.97263714     | 6.38E-08 | 3.75E-05        |
| ENSMUSG00000005823 | Gpr108      | 1.244615898    | 1.98E-07 | 0.0001110401322 |
| ENSMUSG00000021281 | Tnfaip2     | 2.718376198    | 4.31E-07 | 0.0002047594101 |
| ENSMUSG00000025492 | Ifitm3      | 2.866868511    | 4.21E-07 | 0.0002047594101 |
| ENSMUSG00000064215 | Ifi27       | 1.84345901     | 4.87E-07 | 0.0002145415641 |
| ENSMUSG00000026547 | Tagln2      | 2.109105472    | 7.12E-07 | 0.0002928816872 |
| ENSMUSG00000032000 | Birc3       | 2.572742334    | 9.95E-07 | 0.0003960489629 |
| ENSMUSG00000073411 | H2-D1       | 2.527633778    | 1.06E-06 | 0.0004070475827 |
| ENSMUSG00000050335 | Lgals3      | 3.393281644    | 1.10E-06 | 0.0004107083758 |
| ENSMUSG00000024659 | Anxa1       | 4.240660268    | 1.76E-06 | 0.0006036380827 |
| ENSMUSG00000001123 | Lgals9      | 2.499583582    | 2.43E-06 | 0.0007880307778 |
| ENSMUSG00000032508 | Myd88       | 1.675145553    | 2.97E-06 | 0.0009169863925 |
| ENSMUSG00000024048 | Myl12a      | 1.389170024    | 4.82E-06 | 0.001384305619  |
| ENSMUSG00000020806 | Rhbdf2      | 2.26742559     | 5.04E-06 | 0.001412565222  |
| ENSMUSG00000046718 | Bst2        | 3.414917182    | 5.69E-06 | 0.001560110511  |
| ENSMUSG00000042677 | Zc3h12a     | 2.228688221    | 6.33E-06 | 0.001697376062  |
| ENSMUSG00000035778 | Ggta1       | 1.680527217    | 6.49E-06 | 0.001697698461  |
| ENSMUSG00000024610 | Cd74        | 3.968603263    | 7.09E-06 | 0.00178575374   |
| ENSMUSG00000006498 | Ptbp1       | 1.015709563    | 8.83E-06 | 0.002137967909  |
| ENSMUSG00000021822 | Plau        | 2.558993009    | 1.01E-05 | 0.002357554545  |
| ENSMUSG00000053175 | Bcl3        | 2.803964397    | 1.12E-05 | 0.002559919481  |
| ENSMUSG00000026483 | Fam129a     | 2.141133441    | 1.39E-05 | 0.003124703459  |
| ENSMUSG00000032231 | Anxa2       | 2.423230664    | 1.69E-05 | 0.00356571194   |
| ENSMUSG00000044786 | Zfp36       | 1.998561642    | 1.89E-05 | 0.003801868423  |
| ENSMUSG00000032515 | Csmp1       | 2.007517237    | 1.93E-05 | 0.003801868423  |
| ENSMUSG00000056501 | Cebpb       | 2.900627637    | 1.85E-05 | 0.003801868423  |
| ENSMUSG00000030342 | Cd9         | 1.854741289    | 2.06E-05 | 0.003851681615  |
| ENSMUSG00000016256 | Ctsz        | 2.238187235    | 2.25E-05 | 0.004142484691  |
| ENSMUSG00000039899 | Fgl2        | 2.816997691    | 2.38E-05 | 0.00418789384   |
| ENSMUSG00000002603 | Tgfb1       | 1.832966068    | 2.51E-05 | 0.00429670681   |
| ENSMUSG00000031207 | Msn         | 1.763625687    | 2.94E-05 | 0.004710993196  |
| ENSMUSG00000069793 | Slfn9       | 3.32114738     | 4.49E-05 | 0.006934115071  |
| ENSMUSG00000042622 | Maff        | 2.667799568    | 4.62E-05 | 0.007041083918  |
| ENSMUSG00000030339 | Ltbr        | 1.199116786    | 6.07E-05 | 0.008782655951  |
| ENSMUSG00000056737 | Capg        | 2.812724176    | 6.12E-05 | 0.008782655951  |
| ENSMUSG00000037820 | Tgm2        | 1.48966277     | 6.25E-05 | 0.008863208485  |
| ENSMUSG00000054520 | Sh3bp2      | 1.962214765    | 6.63E-05 | 0.00909951932   |
| ENSMUSG00000022175 | Lrp10       | 1.313768879    | 7.28E-05 | 0.009558500028  |
| ENSMUSG00000042626 | Shc1        | 1.253440951    | 9.46E-05 | 0.01167109623   |
| ENSMUSG00000071637 | Cebpd       | 2.370828678    | 9.36E-05 | 0.01167109623   |

|                     |              |              |                 |               |
|---------------------|--------------|--------------|-----------------|---------------|
| ENSMUSG00000034947  | Tmem106a     | 2.586753764  | 9.10E-05        | 0.01167109623 |
| ENSMUSG00000024164  | C3           | 4.417338948  | 0.001001555992  | 0.01223980753 |
| ENSMUSG00000029622  | Arpc1b       | 2.26405037   | 0.001077964748  | 0.01267173227 |
| ENSMUSG00000071713  | Csf2rb       | 2.694183464  | 0.000114197902  | 0.01305133986 |
| ENSMUSG00000003458  | Ncstn        | 0.9039240091 | 0.0001403490682 | 0.01455738276 |
| ENSMUSG00000077714  | Snord17      | 3.957020373  | 0.0001364408886 | 0.01455738276 |
| ENSMUSG00000025044  | Msr1         | 3.980102061  | 0.0001708434726 | 0.01728459822 |
| ENSMUSG00000060802  | B2m          | 2.188011737  | 0.0001764828938 | 0.01742662686 |
| ENSMUSG00000031146  | Plp2         | 2.640328954  | 0.0001788736248 | 0.01752251707 |
| ENSMUSG00000032690  | Oas2         | 2.899084516  | 0.0001862010278 | 0.01795530692 |
| ENSMUSG00000031103  | Elf4         | 2.134146774  | 0.0002184314689 | 0.01982426192 |
| ENSMUSG00000031504  | Rab20        | 3.245680158  | 0.0002169865477 | 0.01982426192 |
| ENSMUSG00000056569  | Mpz          | 4.794145811  | 0.0002236141281 | 0.0200801171  |
| ENSMUSG00000024927  | Rela         | 1.161728014  | 0.0002452821037 | 0.02147175182 |
| ENSMUSG00000035678  | Tnfsf9       | 2.495025263  | 0.0002483461122 | 0.02158687368 |
| ENSMUSG00000025498  | Irf7         | 3.59459734   | 0.0002530570127 | 0.02169085214 |
| ENSMUSG00000002325  | Irf9         | 1.31819847   | 0.0002611979944 | 0.02218884948 |
| ENSMUSG00000029304  | Spp1         | 3.007011827  | 0.0002642599752 | 0.02218884948 |
| ENSMUSG000000021025 | Nfkbia       | 1.743456459  | 0.0002810025796 | 0.0231227656  |
| ENSMUSG00000036461  | Elf1         | 1.537906441  | 0.0002906035385 | 0.02355726471 |
| ENSMUSG00000053113  | Socs3        | 2.073017589  | 0.0003017625677 | 0.02403003466 |
| ENSMUSG00000069893  | 9930111J21Ri | 2.302459751  | 0.0003428744865 | 0.02571362751 |
| ENSMUSG00000037344  | Slc12a9      | 1.007003675  | 0.0003767462002 | 0.02784537933 |
| ENSMUSG00000001750  | Tcirg1       | 1.853516925  | 0.0003801765144 | 0.02793165903 |
| ENSMUSG000000041515 | Irf8         | 2.527579204  | 0.0003872043775 | 0.02811331548 |
| ENSMUSG00000035692  | Isg15        | 3.629665471  | 0.0003989881442 | 0.02879947757 |
| ENSMUSG00000025225  | Nfkib2       | 2.066901094  | 0.0004058713264 | 0.0289576288  |
| ENSMUSG00000033880  | Lgals3bp     | 2.625863947  | 0.0004055294193 | 0.0289576288  |
| ENSMUSG00000024732  | Ccdc86       | 1.339631068  | 0.0004178814035 | 0.02947377236 |
| ENSMUSG00000017760  | Ctsa         | 1.48979444   | 0.000446978337  | 0.03070944493 |
| ENSMUSG00000010358  | Ifi35        | 2.048470684  | 0.0004478408886 | 0.03070944493 |
| ENSMUSG00000070327  | Rnf213       | 1.979368062  | 0.000451430381  | 0.03078455908 |
| ENSMUSG00000027642  | Rpn2         | 1.109015071  | 0.000473520827  | 0.03175925618 |
| ENSMUSG00000040212  | Emp3         | 2.516926234  | 0.0004833556062 | 0.03175925618 |
| ENSMUSG00000028459  | Cd72         | 4.170418301  | 0.0004801830509 | 0.03175925618 |
| ENSMUSG00000079111  | Kdelr2       | 1.713849003  | 0.0005627808393 | 0.03544083622 |
| ENSMUSG00000068220  | Lgals1       | 2.768181906  | 0.0005798469293 | 0.03617543906 |
| ENSMUSG00000034422  | Parp14       | 1.805964973  | 0.0005887814164 | 0.03633664511 |
| ENSMUSG00000015839  | Nfe2l2       | 1.698902794  | 0.0005988428021 | 0.0364252636  |
| ENSMUSG00000050370  | Ch25h        | 3.439061725  | 0.0005954429698 | 0.0364252636  |
| ENSMUSG00000028962  | Slc4a2       | 0.9846151325 | 0.0006156533514 | 0.03704770595 |
| ENSMUSG00000040435  | Ppp1r15a     | 1.494796312  | 0.0006183121952 | 0.03704770595 |
| ENSMUSG00000027322  | Siglec1      | 3.506800558  | 0.0006510686348 | 0.03808597232 |
| ENSMUSG00000005087  | Cd44         | 2.231325846  | 0.0006879444343 | 0.03986524955 |
| ENSMUSG00000029605  | Oas1b        | 2.646474318  | 0.0007359934737 | 0.0420572567  |
| ENSMUSG00000027580  | Helz2        | 1.737077817  | 0.000742656296  | 0.04224242701 |
| ENSMUSG00000026728  | Vim          | 2.122629807  | 0.0007534359674 | 0.0426589915  |
| ENSMUSG00000047407  | Tgif1        | 1.770642259  | 0.0007625222235 | 0.04297630961 |



|                    |             |                            |               |
|--------------------|-------------|----------------------------|---------------|
| ENSMUSG0000009687  | Fxyd5       | 2.292554446 .0008059062446 | 0.04421022567 |
| ENSMUSG00000037321 | Tap1        | 2.895699509 .0008558003693 | 0.04632957877 |
| ENSMUSG00000003541 | Ier3        | 2.484449459 .0008805598133 | 0.04705086483 |
| ENSMUSG00000095115 | Itprip12    | 1.375294008 .0009090068276 | 0.04794816784 |
| ENSMUSG00000086513 | 9130208D14R | 2.325323112 .0009496017873 | 0.04843361513 |
| ENSMUSG00000027514 | Zbp1        | 3.876672081 .0009495778691 | 0.04843361513 |

**Table S9. Characterization of brain metastatic lesions from cancer patients.**

| BrM (Brain metastasis)<br>Sample ID | Cancer Type                      | Staining (IHC+IF) |        |       |                            |                             |                               |
|-------------------------------------|----------------------------------|-------------------|--------|-------|----------------------------|-----------------------------|-------------------------------|
|                                     |                                  | Cytokeratin       | SEMA4D | c-MYC | Infiltrated<br>Iba1+ cells | % of Ki67<br>positive cells | % apoptotic<br>positive cells |
| BrM-3                               | Breast cancer                    | +                 | -      | ++    | yes                        | 24                          | 2                             |
| BrM-4                               | Colon cancer                     | +                 | -      | ++    | yes                        | 60                          | 6                             |
| BrM-5                               | Colon cancer                     | -                 | +      | -     | no                         | 59                          | 54                            |
| BrM-6                               | Lung cancer                      | +                 | -      | +     | yes                        | 15                          | 23                            |
| BrM-7                               | Breast cancer                    | +                 | -      | ++    | yes                        | 7                           | 2                             |
| BrM-8                               | Lung cancer                      | +                 | ++     | -     | yes                        | 14                          | 52                            |
| BrM-9                               | Gastroesophageal junction cancer | +                 | -      | +++   | yes                        | 6                           | 9                             |
| BrM10                               | Prostate cancer                  | +                 | ++     | ++    | yes                        | 29                          | 6                             |
| BrM11                               | Breast cancer                    | +                 | +      | ++    | N/A                        | 18                          | 13                            |
| BrM12                               | Breast cancer                    | +                 | +      | ++    | yes                        | 8                           | 12                            |
| BrM14                               | Lung cancer                      | +                 | +      | -     | yes                        | 8                           | 45                            |
| BrM15                               | Colon cancer                     | +                 | +++    | ++    | yes                        | 4                           | 12                            |

11 out of 12    7 out of 12    9 out of 12    10 out of 11
